# Supplementary material
Source: HighWire-hosted journal article supplement (https://jnm.snmjournals.org/highwire/filestream/99536/field_highwire_adjunct_files/0/242347_Supplemental_Data.pdf)
Supplement: 242347_Supplemental_Data.pdf [file 242347_Supplemental_Data.pdf]

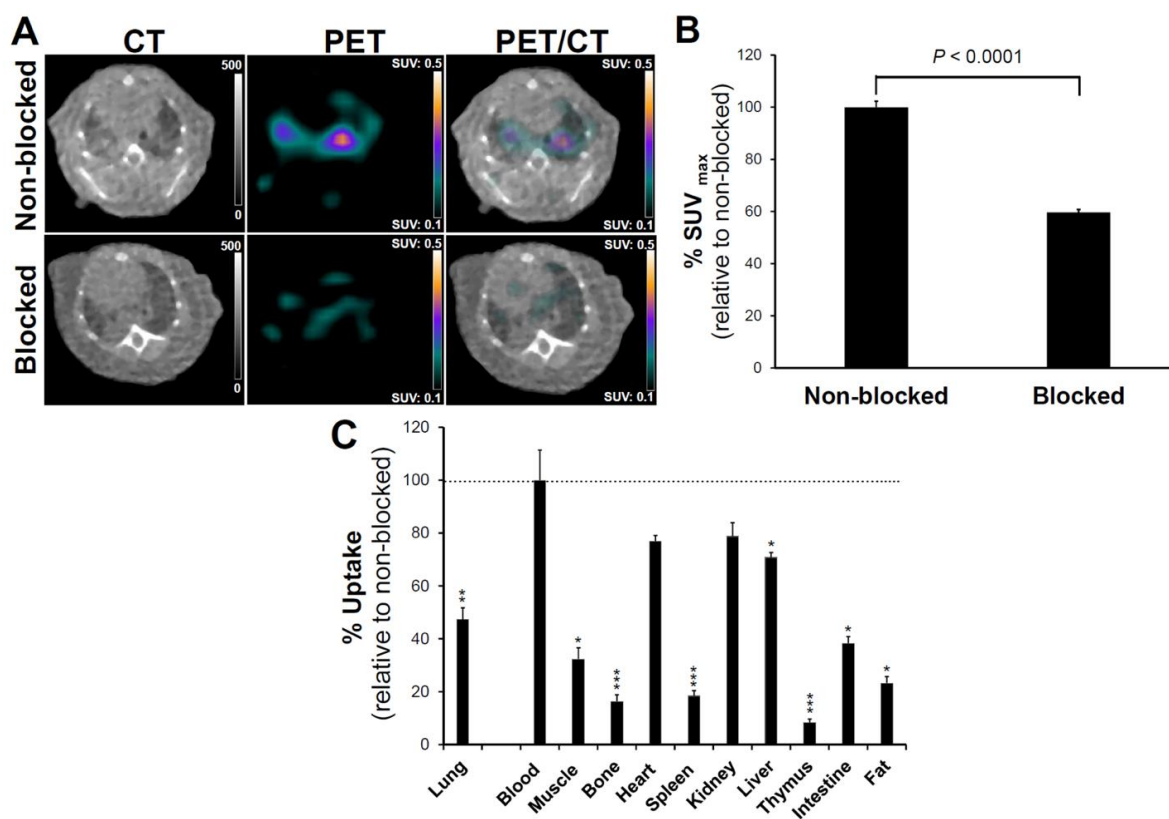

**Supplemental Figure 1. Specificity of  $^{64}\text{Cu}$ -LLP2A uptake.** (A) Representative CT, PET and fused PET/CT images of mice 2 days post intratracheal instillation of 40  $\mu\text{g}$  lipopolysaccharide without (top row: non-blocked) or with (bottom row: blocked) co-administration of non-labeled LLP2A. Visual assessment demonstrates a marked decline in  $^{64}\text{Cu}$ -LLP2A uptake in the inflamed lungs, indicating the specificity of uptake. (B) *In vivo* quantification of PET images confirms a significant reduction in lung uptake of  $^{64}\text{Cu}$ -LLP2A uptake by non-labeled LLP2A (data are expressed as % SUV<sub>max</sub> in the blocked relative to the non-blocked group). (C) The specificity of  $^{64}\text{Cu}$ -LLP2A uptake is also confirmed by *ex vivo* biodistribution, which demonstrated a significant reduction in  $^{64}\text{Cu}$ -LLP2A in inflamed lungs in the blocked group (data are expressed as the % uptake in the blocked relative to the non-blocked group). Notably,  $^{64}\text{Cu}$ -LLP2A was markedly decreased by co-administration of non-labeled compound in spleen, thymus, and bone where abundant VLA-4 expressing immune or hematopoietic cells reside. N = 4 in the non-blocked group and = 3 in the blocked group. \**P* < 0.05, \*\**P* < 0.01, and \*\*\**P* < 0.001 compared to the non-blocked group.

**Supplemental Table 1.** List of TaqMan primers used for quantitative RT-PCR.

| Species      | Assay name   | Gene full name                  | Assay ID      |
|--------------|--------------|---------------------------------|---------------|
| <b>Mouse</b> | <i>Cd68</i>  | CD68                            | Mm03047343_m1 |
|              | <i>Il1b</i>  | IL-1 $\beta$                    | Mm00434228_m1 |
|              | <i>Il12</i>  | IL-12                           | Mm00434174_m1 |
|              | <i>Itga4</i> | integrin $\alpha_4$             | Mm01277951_m1 |
|              | <i>Itgb1</i> | integrin $\beta_1$              | Mm01253230_m1 |
|              | <i>Ly6g</i>  | Ly6G                            | Mm04934123_m1 |
|              | <i>Mpo</i>   | Myeloperoxidase                 | Mm01298424_m1 |
|              | <i>Nos2</i>  | nitric oxidase synthase-2       | Mm00440502_m1 |
|              | <i>Rn18s</i> | 18S ribosomal RNA               | Mm03928990_g1 |
|              | <i>Tnf</i>   | tumor necrosis factor- $\alpha$ | Mm00443258_m1 |

**Supplemental Table 2.** List of antibodies used for immunostaining.

| Antibody                    | Clone       | Source                 | Incubation time |
|-----------------------------|-------------|------------------------|-----------------|
| anti-mouse CD11b            | M1/70       | BioLegend              | 60 min          |
| anti-mouse CD68             | FA-11       | Bio-Rad Laboratories   | 60 min          |
| anti-mouse Ly6G             | 1A8         | BioLegend              | 60 min          |
| anti-mouse CD49d            | 9C10        | BioLegend              | 60 min          |
| Cy3-conjugated anti-rat IgG | 712-165-153 | Jackson ImmunoResearch | 45 min          |
